# Supplementary material for: A Double-Layer Hydrogel Dressing with High Mechanical Strength and Water Resistance Used for Drug Delivery
Source: MDPI journal article supplement (doi:10.3390/molecules28020499), 2023-01-04
Supplement: s1 [file s1]

## Supporting Information

### Experimental section

#### Determination of the $\beta$ -CDP activity

Briefly, the standard curve for the concentration of  $\beta$ -CD and the absorbance of PP solution was quantified with the photometric titration method. The  $\beta$ -CD solutions ( $1 \times 10^{-3}$  M) of 0.00, 0.20, 0.60, 1.00, 1.40, 1.80 and 2.00 mL were added separately to 50 mL volumetric flasks. After that, each flask was added with 1.00 mL of PP solution ( $1 \times 10^{-3}$  M). Then, all flasks were diluted with buffer solution (pH = 9.18) to 50 mL. After 24 h, they were examined with a UV–Vis spectrophotometer, and the absorbance of the calibration solutions of  $\beta$ -CD were recorded at a wavelength of 553 nm in room temperature. The contents of active monomers were calculated by the regression linear relationship of the absorbance difference between the  $\beta$ -CD blank (free PP solution) and their corresponding PP/ $\beta$ -CD complex solutions ( $\Delta A$ ) against  $C_{CD}$ . The content of  $\beta$ -CD ( $C_{CD}$ ) was calculated with Equation (1):

$$\Delta A = 1.44875C_{CD} + 0.01138 \quad (1)$$

Where  $C_{CD}$  denotes the concentration of  $\beta$ -CD (mM).

Then, the sample of PP/ $\beta$ -CDP was prepared by the above method (0.20 mL  $\beta$ -CD solutions ( $1 \times 10^{-3}$  M) and 1.00 mL of PP solution ( $1 \times 10^{-3}$  M)). And the proportion of active monomers to total monomers of  $\beta$ -CDP was obtained by Equation (1). Here,  $\Delta A$  was calculated as the absorbance differences between the solutions of  $\beta$ -CD blank sample and PP/ $\beta$ -CDP. Finally, the activity of  $\beta$ -CDP was calculated by Equation (2):

$$\text{activity of } \beta - \text{CDP} = \frac{C_{\beta - \text{CDP}}}{0.004 \times 5} \times 100 \% \quad (2)$$

Table S1. Arrangements and analysis of the 3-variable 3-level orthogonal experiment of MSL hydrogels.

| Test number   | Component (ABC)        |                        |                        | stress strength(kPa) |
|---------------|------------------------|------------------------|------------------------|----------------------|
|               | PVA(A)                 | CMC(B)                 | Soaking time(C)        |                      |
| 1             | 2.5 g                  | 0.1 g                  | 0.5 h                  | 425.500              |
| 2             | 2.5 g                  | 0.2 g                  | 1.0 h                  | 1100.839             |
| 3             | 2.5 g                  | 0.3 g                  | 1.5 h                  | 864.668              |
| 4             | 3.0 g                  | 0.1 g                  | 1.0 h                  | 1084.851             |
| 5             | 3.0 g                  | 0.2 g                  | 1.5 h                  | 1690.107             |
| 6             | 3.0 g                  | 0.3 g                  | 0.5 h                  | 1412.653             |
| 7             | 3.5 g                  | 0.1 g                  | 1.5 h                  | 1622.714             |
| 8             | 3.5 g                  | 0.2 g                  | 0.5 h                  | 1393.033             |
| 9             | 3.5 g                  | 0.3 g                  | 1.0 h                  | 1460.458             |
| K1            | 2391.007               | 3133.065               | 3231.186               |                      |
| K2            | 4187.611               | 4183.979               | 3646.148               |                      |
| K3            | 4476.205               | 3737.779               | 4177.489               |                      |
| k1            | 797.002                | 1044.355               | 1077.062               |                      |
| k2            | 1395.870               | 1394.660               | 1215.383               |                      |
| k3            | 1492.068               | 1245.926               | 1392.496               |                      |
| Range R       | 695.066                | 350.305                | 315.434                |                      |
| Optimal level | A <sub>3</sub> (3.5 g) | B <sub>2</sub> (0.2 g) | C <sub>3</sub> (1.5 h) |                      |

Table S2. Arrangements and analysis of the 4-variable 3-level orthogonal experiment of DRL hydrogels.

| Test number   | Component (CABD)       |                        |                         | Sustained release        |                            | Releasing amount | Score |
|---------------|------------------------|------------------------|-------------------------|--------------------------|----------------------------|------------------|-------|
|               | PVA(A)                 | $\beta$ -CDP(B)        | DS(C)                   | Freez-thaw               | time                       |                  |       |
|               |                        |                        |                         | times (D)                | (The time of 85 % release) |                  |       |
| 1             | 1.5 g                  | 0.1 g                  | 0.02 g                  | 1                        | 6 h                        | 0.948            | 0.641 |
| 2             | 1.5 g                  | 0.2 g                  | 0.04 g                  | 2                        | 4 h                        | 0.922            | 0.544 |
| 3             | 1.5 g                  | 0.3 g                  | 0.06 g                  | 3                        | 6 h                        | 0.892            | 0.571 |
| 4             | 2.0 g                  | 0.1 g                  | 0.04 g                  | 3                        | 2 h                        | 0.968            | 0.526 |
| 5             | 2.0 g                  | 0.2 g                  | 0.06 g                  | 1                        | 2 h                        | 0.929            | 0.506 |
| 6             | 2.0 g                  | 0.3 g                  | 0.02 g                  | 2                        | 4 h                        | 0.908            | 0.537 |
| 7             | 2.5 g                  | 0.1 g                  | 0.06 g                  | 2                        | 2 h                        | 0.963            | 0.523 |
| 8             | 2.5 g                  | 0.2 g                  | 0.02 g                  | 3                        | 6 h                        | 0.929            | 0.589 |
| 9             | 2.5 g                  | 0.3 g                  | 0.04 g                  | 1                        | 2 h                        | 0.920            | 0.501 |
| K1            | 1.756                  | 1.689                  | 1.767                   | 1.648                    |                            |                  |       |
| K2            | 1.569                  | 1.640                  | 1.571                   | 1.605                    |                            |                  |       |
| K3            | 1.614                  | 1.610                  | 1.600                   | 1.686                    |                            |                  |       |
| k1            | 0.585                  | 0.563                  | 0.589                   | 0.549                    |                            |                  |       |
| k2            | 0.523                  | 0.547                  | 0.524                   | 0.535                    |                            |                  |       |
| k3            | 0.538                  | 0.537                  | 0.533                   | 0.562                    |                            |                  |       |
| Range R       | 0.062                  | 0.026                  | 0.065                   | 0.027                    |                            |                  |       |
| Optimal level | A <sub>1</sub> (1.5 g) | B <sub>1</sub> (0.1 g) | C <sub>1</sub> (0.02 g) | D <sub>3</sub> (3 times) |                            |                  |       |

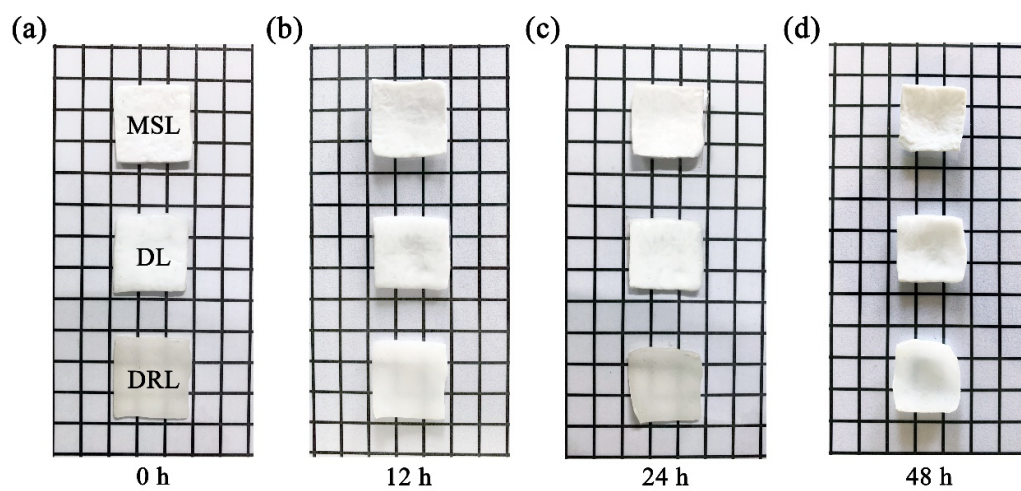

Figure S1. Water loss display of hydrogel in different time periods.
